# Supplementary material for: Splicing factor TRA2B enhances synthesis of androgen receptor variant AR-V7 in prostate cancer cells
Source: JCI journal article supplement (doi:10.1172/jci198264), 2026-04-01

**Figure 1B**

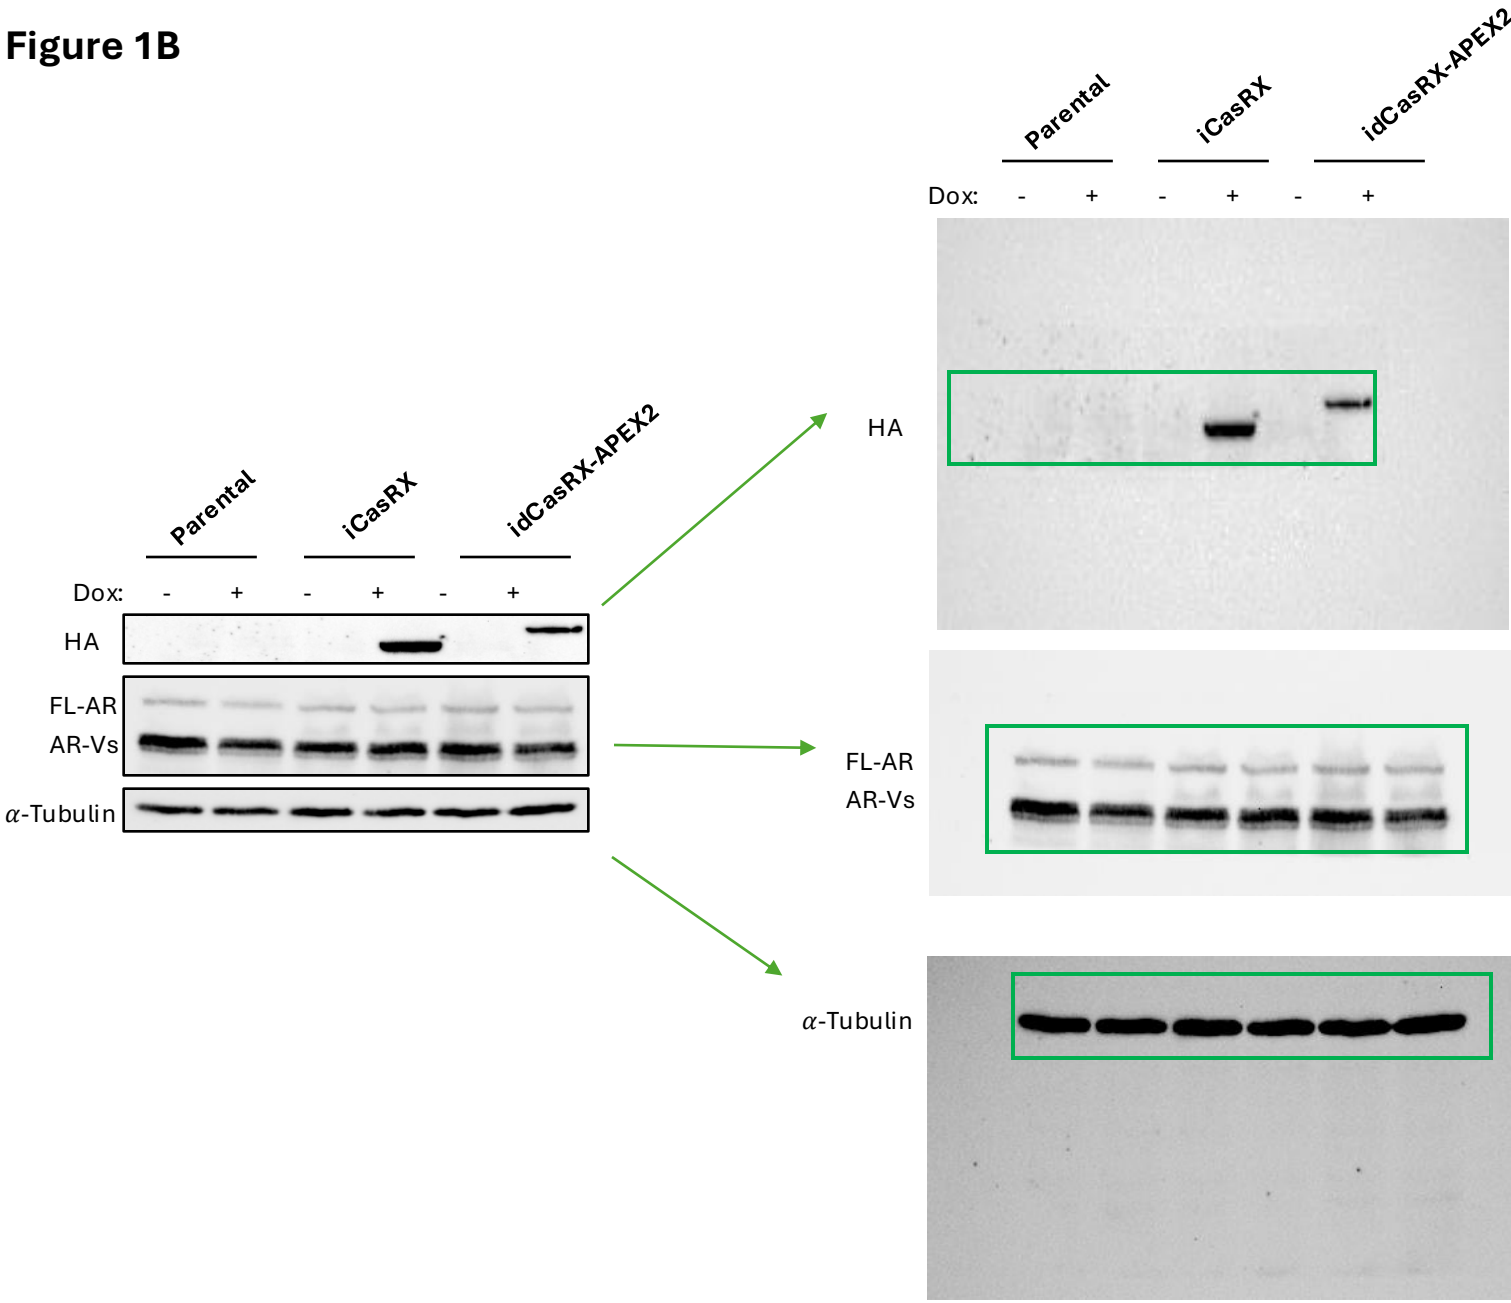

Figure 1F

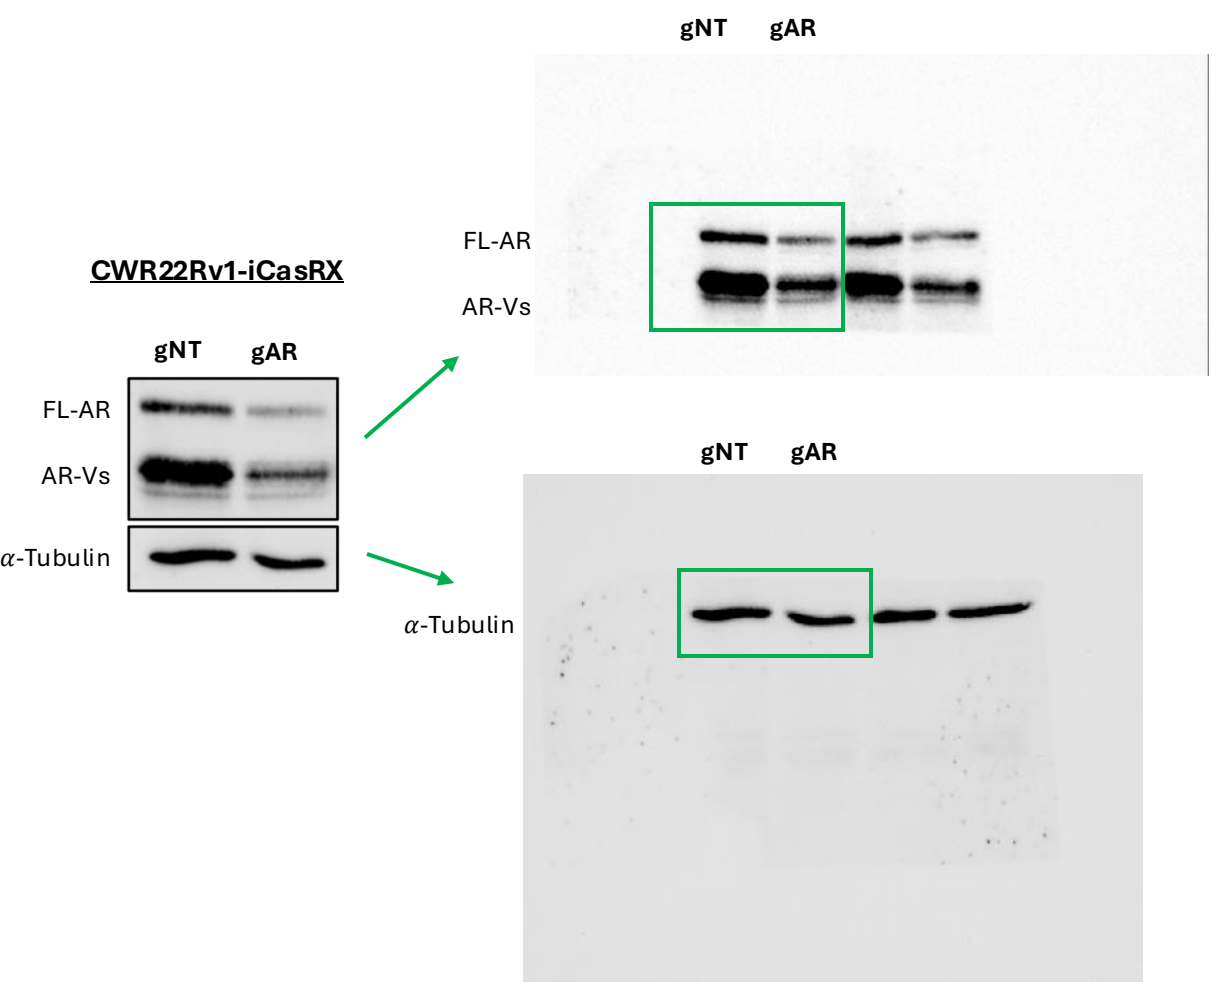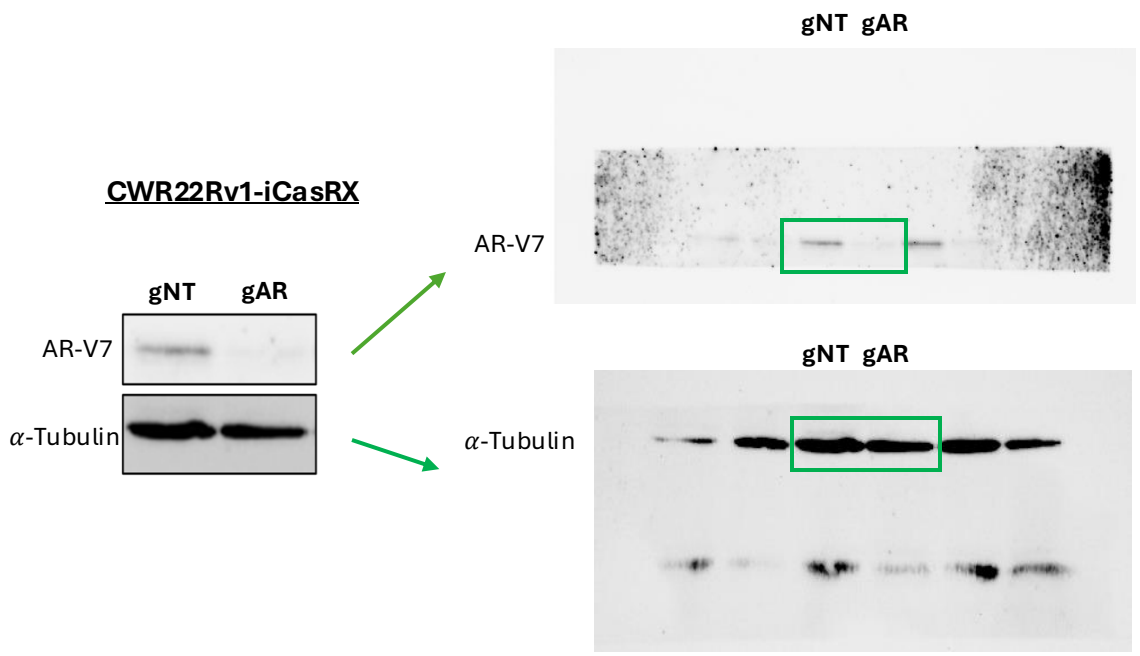

Figure 1G

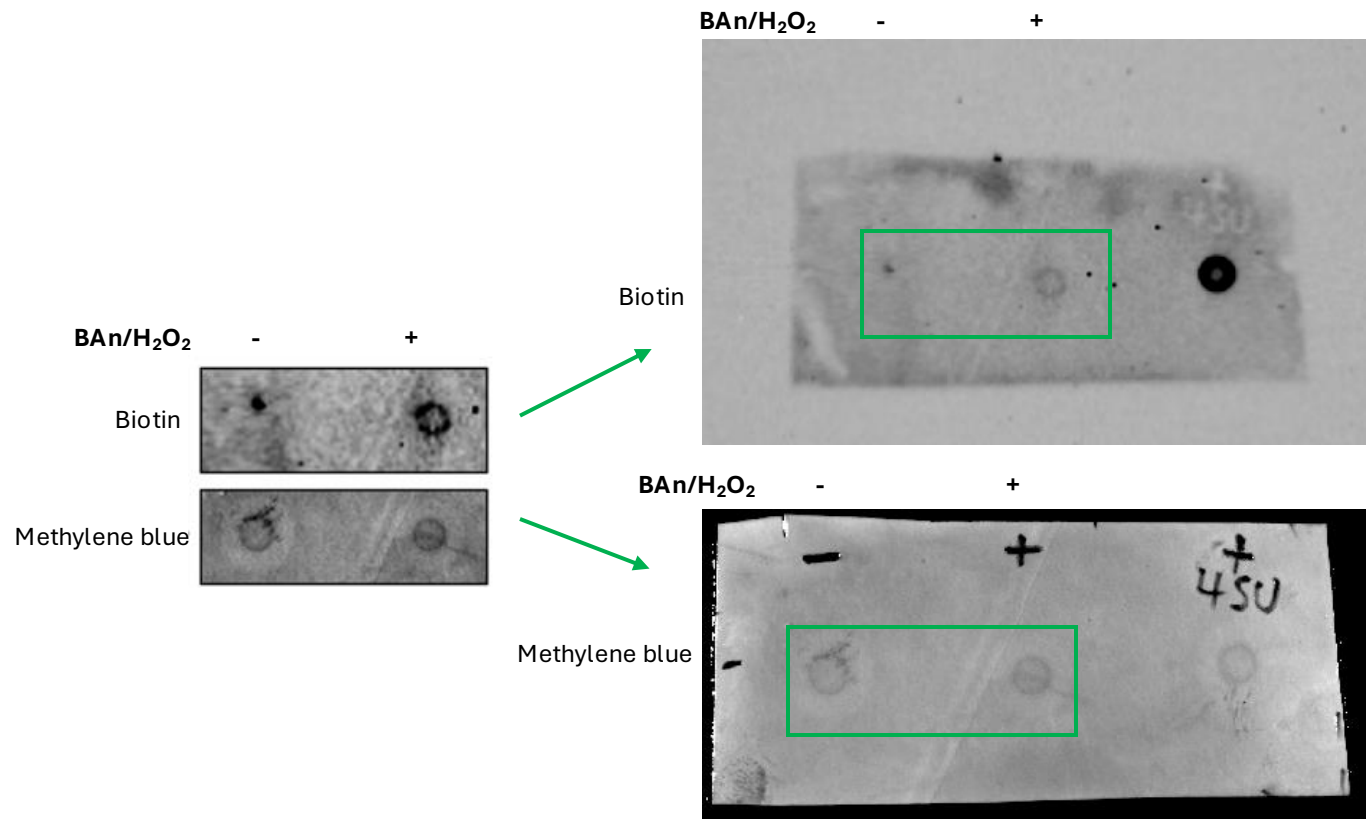

Figure 11

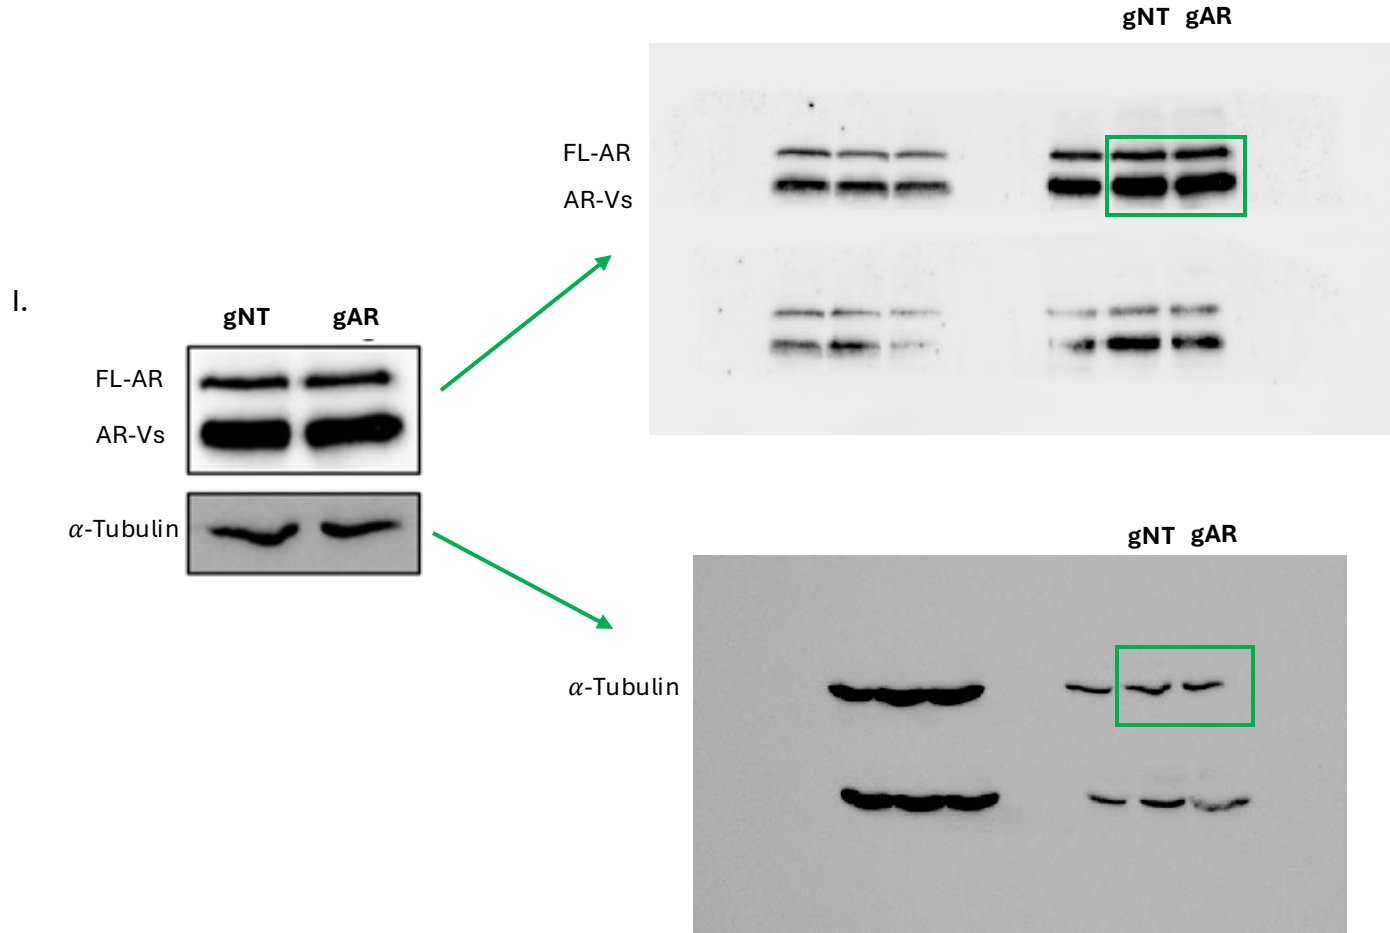

Figure 3D

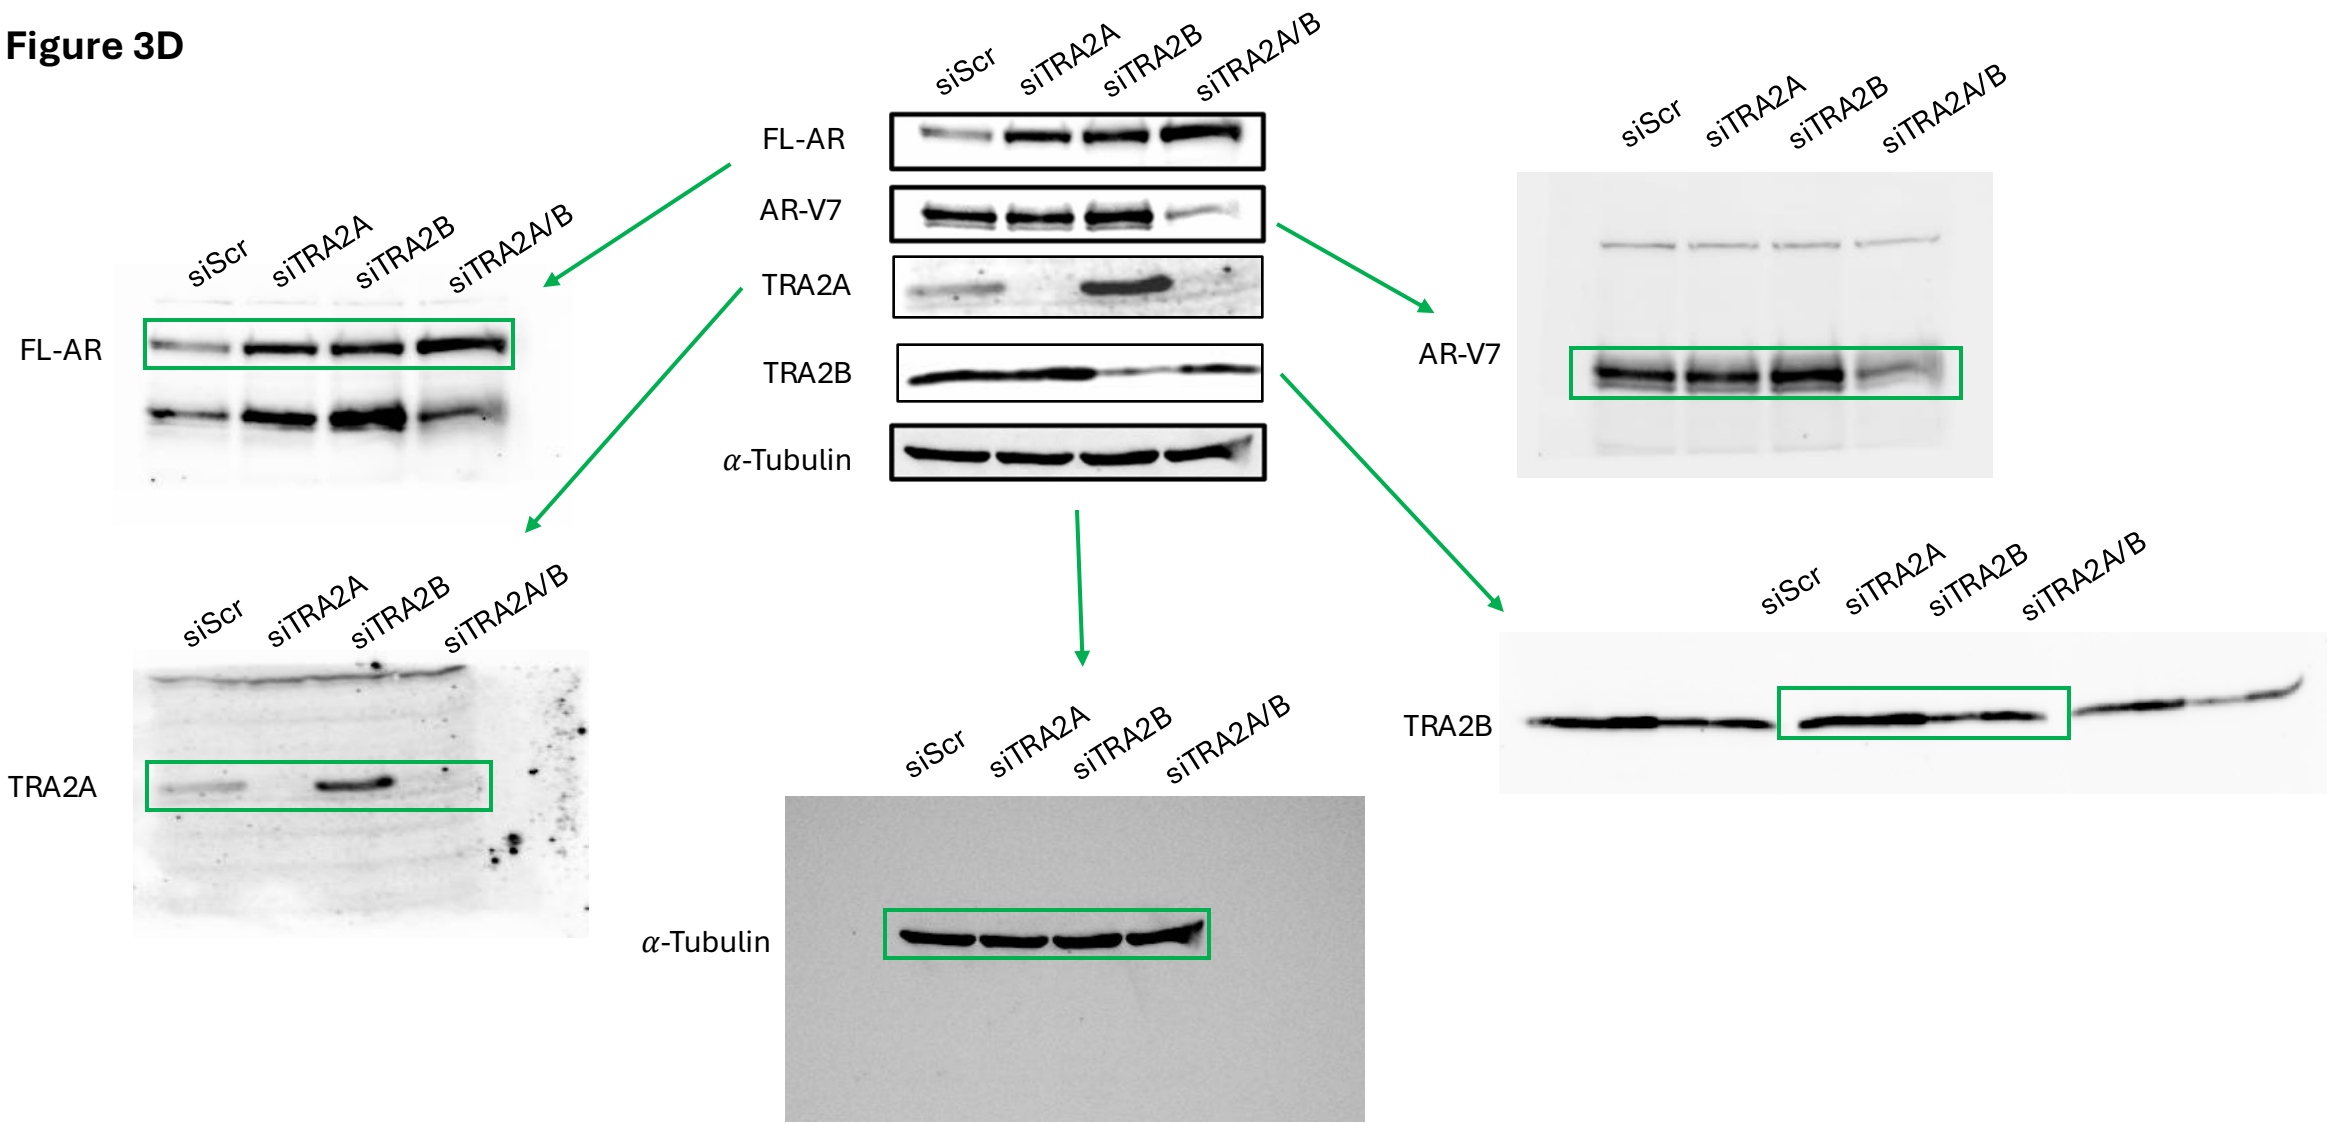

**Figure 3E**

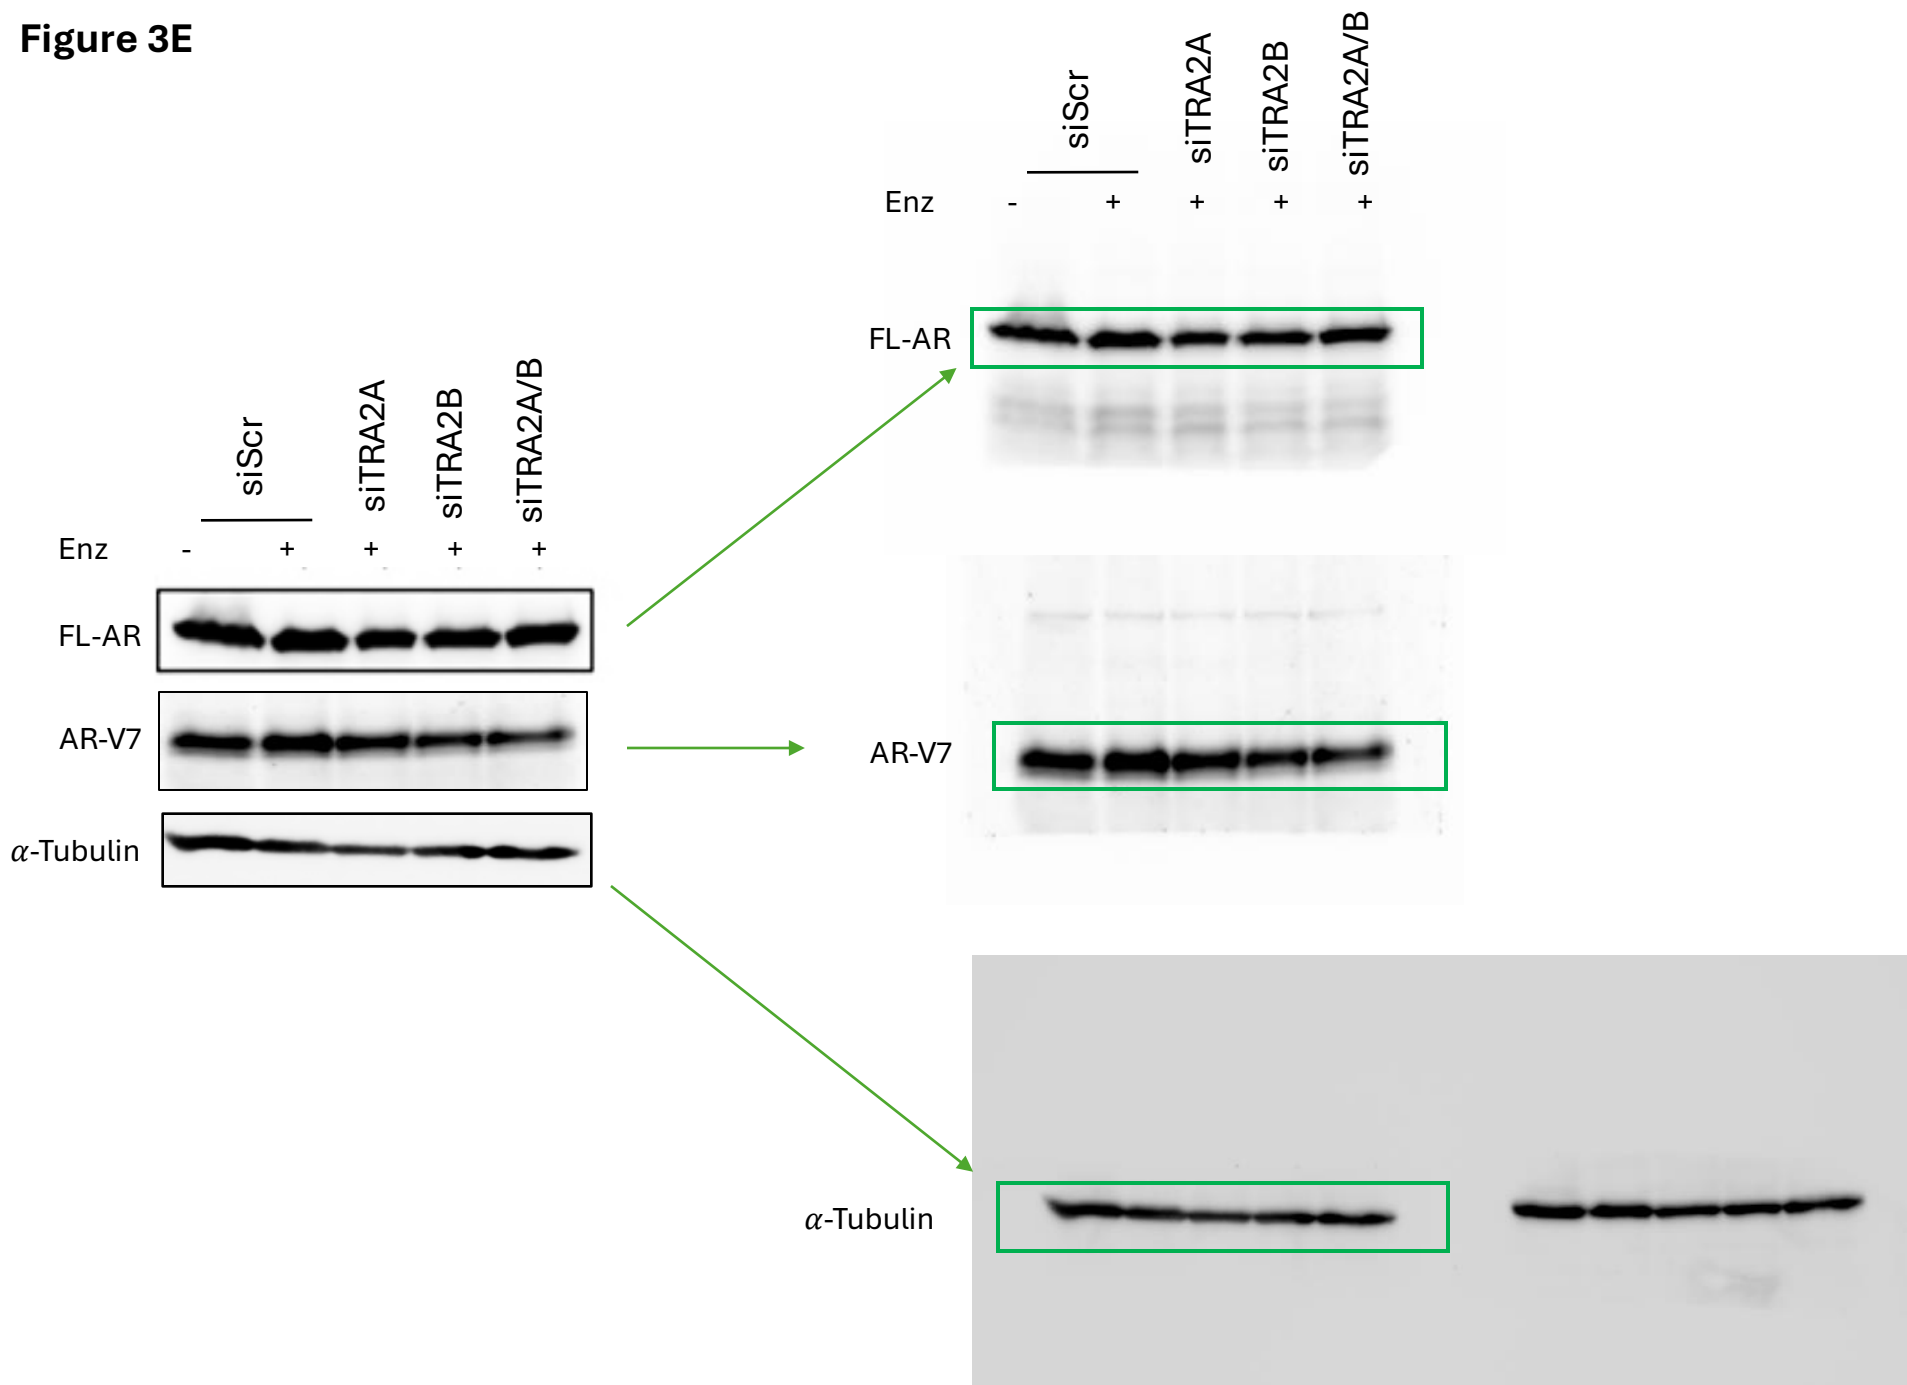

# Supplementary Figure S2B

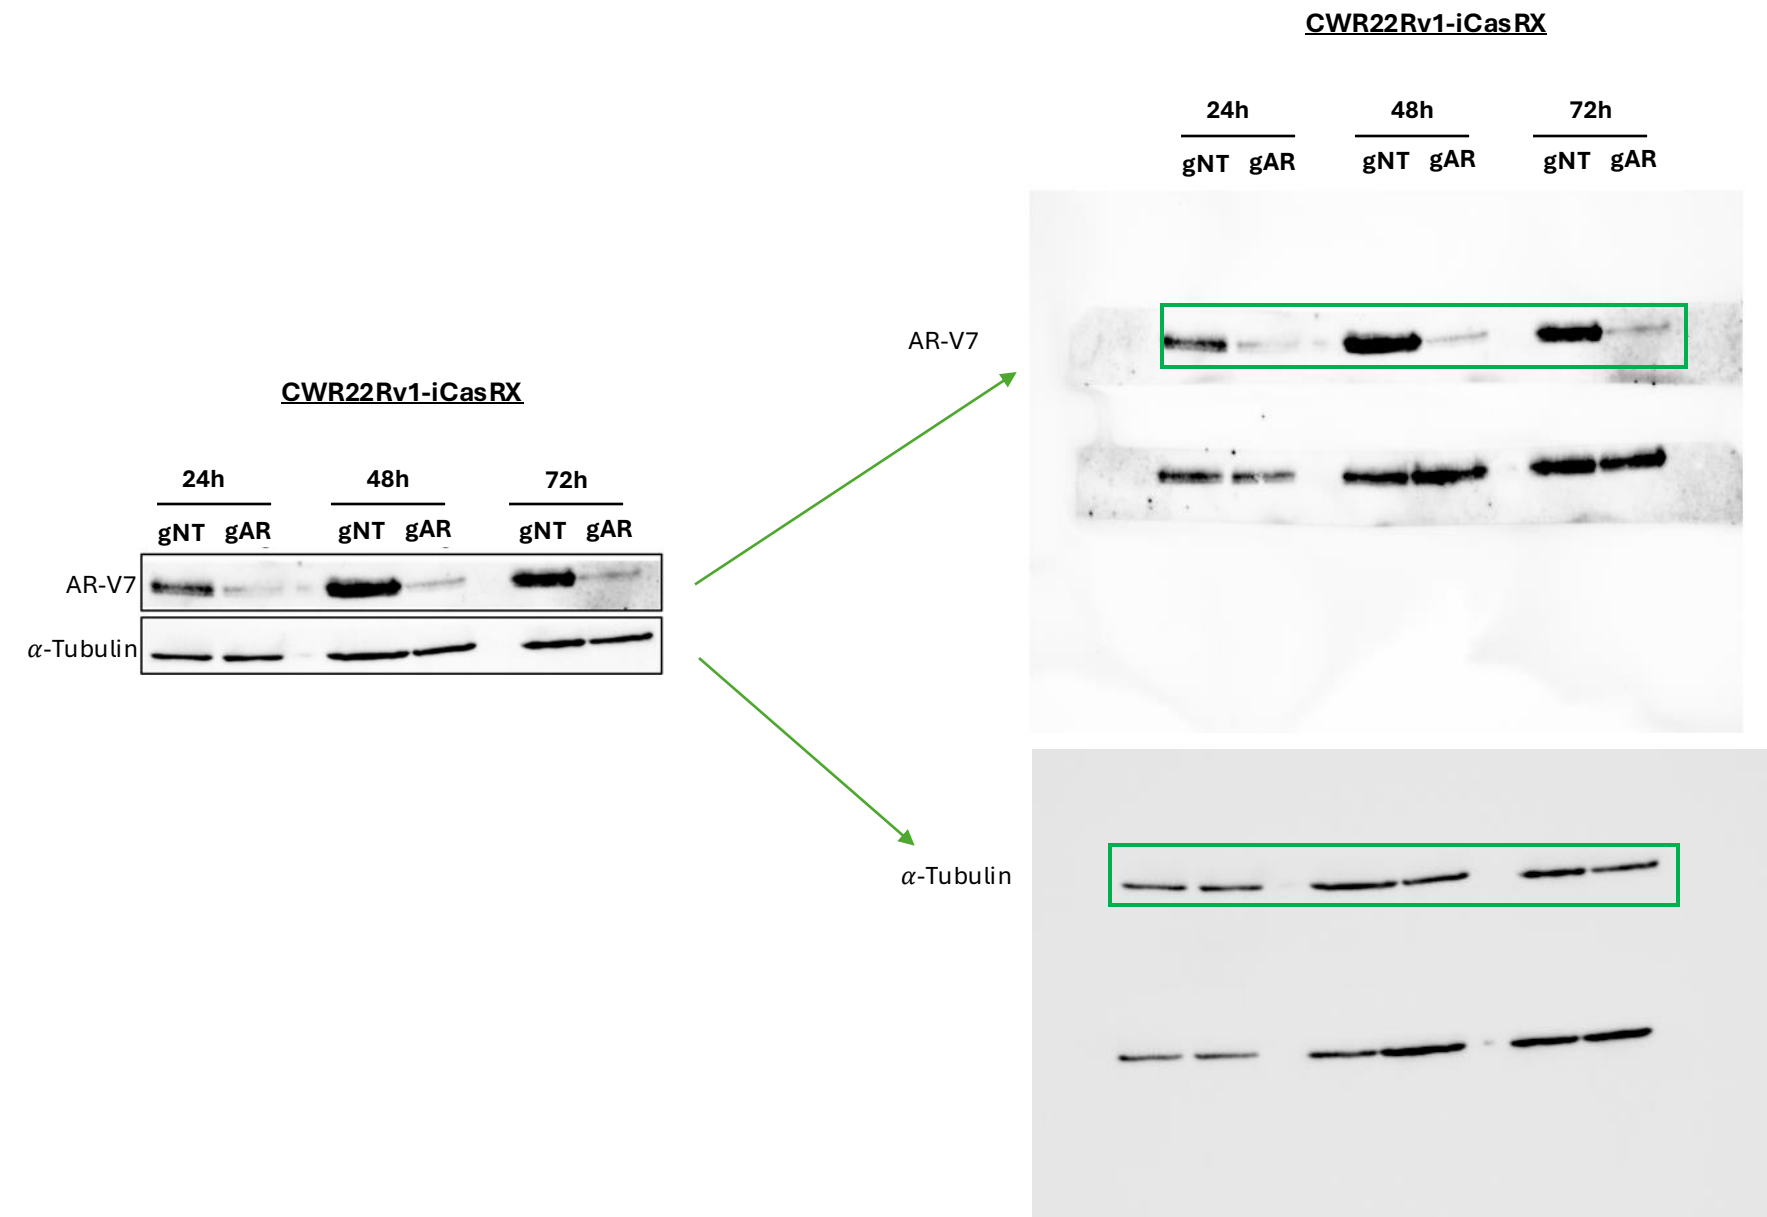

# Supplementary Figure S7

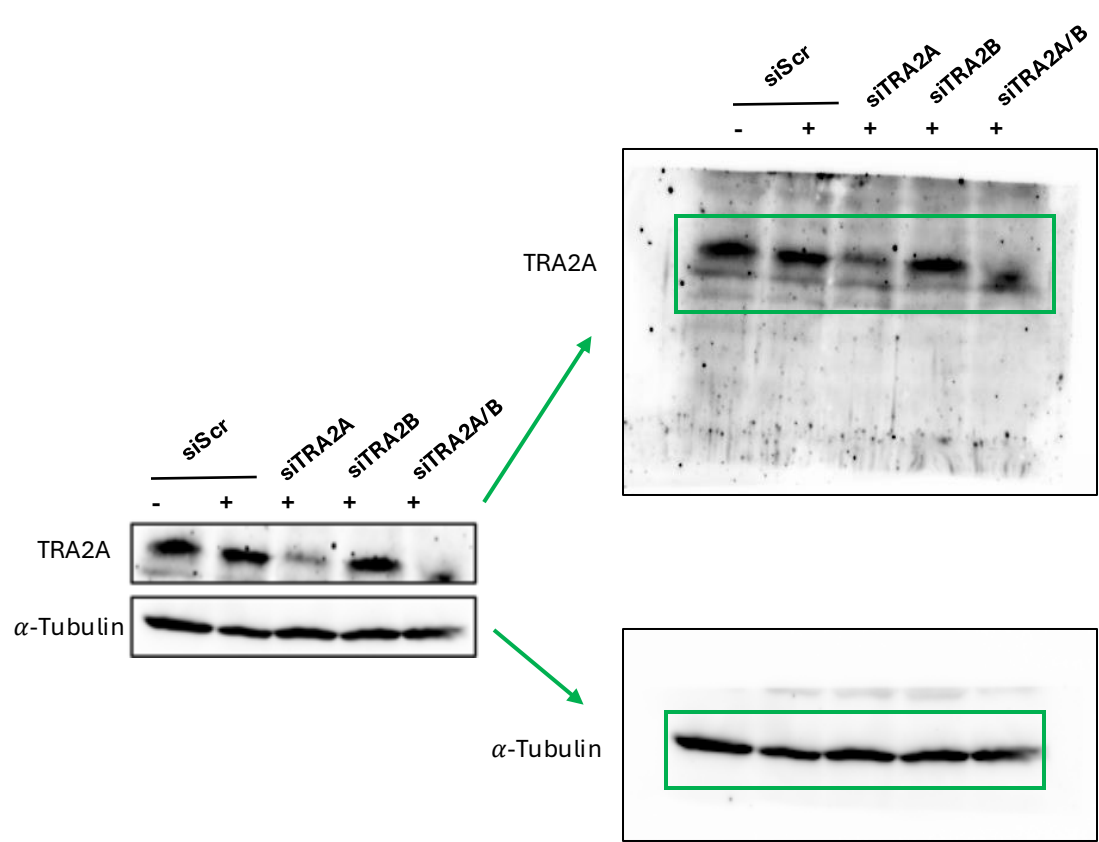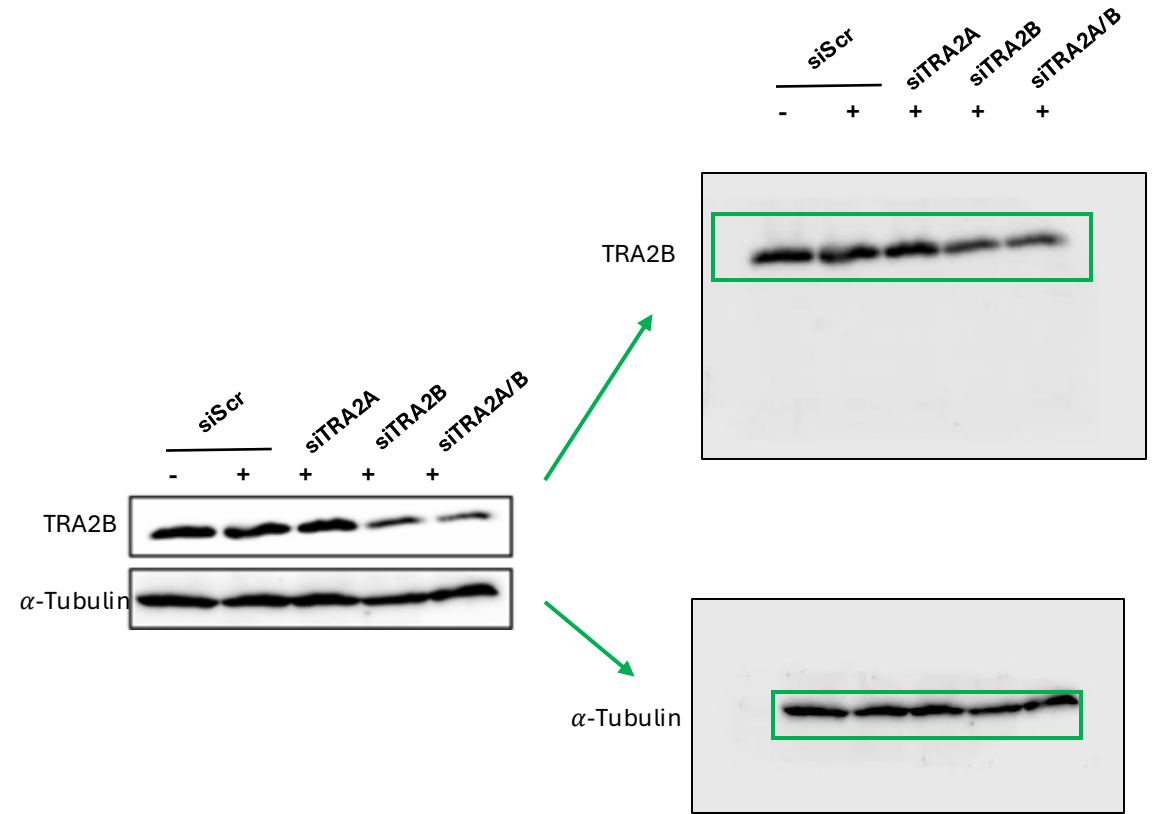

Supplement: sd2 [file 2]
